1 Proteomic analysis of the *Pseudomonas aeruginosa* iron starvation response reveals PrrF  
2 sRNA-dependent regulation of amino acid metabolism, iron-sulfur cluster biogenesis, motility,  
3 and zinc homeostasis

4

5 Short title: Proteomics of *P. aeruginosa* reveals novel PrrF regulation

6

7 Cassandra E. Nelson<sup>1¶</sup>, Weiliang Huang<sup>1¶</sup>, Luke K. Brewer<sup>1</sup>, Angela T. Nguyen<sup>1#</sup>, Maureen A.  
8 Kane<sup>1\*</sup>, Angela Wilks<sup>1\*</sup>, Amanda G. Oglesby-Sherrouse<sup>1,2\*</sup>

9

10 <sup>1</sup>University of Maryland, Baltimore, School of Pharmacy, Department of Pharmaceutical  
11 Sciences, Baltimore, Maryland 21201

12

13 <sup>2</sup>University of Maryland, Baltimore, School of Medicine, Department of Microbiology and  
14 Immunology, Baltimore, Maryland 21201

15

16 <sup>#</sup>Current Address: Silliker Food Science Center, 3600 Eagle Nest Drive, Crete, IL 60417

17

18 <sup>¶</sup>Equal contributions

19 <sup>\*</sup>Corresponding authors

20

21 To whom correspondence should be addressed: [aoglesby@rx.umaryland.edu](mailto:aoglesby@rx.umaryland.edu);

22 [mkane@rx.umaryland.edu](mailto:mkane@rx.umaryland.edu); [awilks@rx.umaryland.edu](mailto:awilks@rx.umaryland.edu)

23 **ABSTRACT**

24 Iron is a critical nutrient for most microbial pathogens, and the innate immune system  
25 exploits this requirement by sequestering iron and other metals through a process termed  
26 nutritional immunity. The opportunistic pathogen *Pseudomonas aeruginosa* provides a model  
27 system for understanding the microbial response to host iron depletion, as this organism  
28 exhibits a high requirement for iron as well as an exquisite ability to overcome iron deprivation  
29 during infection. Hallmarks of *P. aeruginosa*'s iron starvation response include the induction of  
30 multiple high affinity iron acquisition systems and an "iron sparing response" that is post-  
31 transcriptionally mediated by the PrrF small regulatory RNAs (sRNAs). Here, we used liquid  
32 chromatography-tandem mass spectrometry to conduct label-free proteomics of the *P.*  
33 *aeruginosa* iron starvation response, revealing several iron-regulated processes that have not  
34 been previously described. Iron starvation induced multiple proteins involved in branched chain  
35 and aromatic amino acid catabolism, providing the capacity for iron-independent entry of  
36 carbons into the TCA cycle. Proteins involved in sulfur assimilation and cysteine biosynthesis  
37 were reduced upon iron starvation, while proteins involved in iron-sulfur cluster biogenesis were  
38 paradoxically increased, highlighting the central role of iron in *P. aeruginosa* metabolism. Iron  
39 starvation also resulted in changes in the expression of several zinc-responsive proteins, as well  
40 as the first experimental evidence for increased levels of twitching motility proteins upon iron  
41 starvation. Subsequent proteomics analyses demonstrated that the PrrF sRNAs were required  
42 for iron regulation of many of these newly-identified proteins, and we identified PrrF  
43 complementarity with mRNAs encoding key iron-regulated proteins involved in amino acid  
44 metabolism, iron-sulfur biogenesis, and zinc homeostasis. Combined, these results provide the  
45 most comprehensive view of the *P. aeruginosa* iron starvation response to date and outline  
46 novel roles for the PrrF sRNAs in the *P. aeruginosa* iron sparing response and pathogenesis.

47 **AUTHOR SUMMARY**

48 Iron is central for the metabolism of almost all microbial pathogens, and as such this  
49 element is sequestered by the host innate immune system to restrict microbial growth. Defining  
50 the response of microbial pathogens to iron starvation is therefore critical for understanding how  
51 pathogens colonize and propagate within the host. The opportunistic pathogen *Pseudomonas*  
52 *aeruginosa*, which causes significant morbidity and mortality in compromised individuals,  
53 provides an excellent model for studying this response due to its high requirement for iron yet  
54 well-documented ability to overcome iron starvation. Here we used label-free proteomics to  
55 investigate the *P. aeruginosa* iron starvation response, revealing a broad landscape of  
56 metabolic and metal homeostasis changes that have not previously been described. We further  
57 provide evidence that many of these processes are regulated through the iron responsive PrrF  
58 small regulatory RNAs, which are integral to *P. aeruginosa* iron homeostasis and virulence.  
59 These results demonstrate the power of proteomics for defining stress responses of microbial  
60 pathogens, and they provide the most comprehensive analysis to date of the *P. aeruginosa* iron  
61 starvation response.

62

## 63 INTRODUCTION

64 Iron is an essential micronutrient for nearly all forms of life, and presents a central  
65 paradigm for nutritional immunity, whereby the host sequesters iron from invading microbial  
66 pathogens. (1, 2). In turn, pathogens express a variety of high affinity iron acquisition systems to  
67 scavenge host iron (3, 4). In aerobic environments, iron poses the potential for toxicity through  
68 the production of reactive oxygen species (5). To balance the essentiality of iron with its  
69 potential for toxicity, bacteria must regulate the uptake, use, and storage of this nutrient in  
70 response to iron availability. In iron-replete conditions, iron uptake systems are repressed, while  
71 proteins involved in iron storage and oxidative stress protection are induced (6). Upon iron  
72 starvation, iron uptake systems are upregulated, while non-essential iron containing proteins are  
73 repressed in a strategy referred to as the iron-sparing response (7). Due to the central role of  
74 iron in numerous metabolic pathways, the iron sparing response is likely to elicit a substantial  
75 reorganization of bacterial metabolic networks. However, the full impact of iron starvation on  
76 bacterial metabolism, and how these changes impact pathogenesis, remain unclear.

77 As a pathogen with a substantial metabolic requirement for iron, *Pseudomonas*  
78 *aeruginosa* is an ideal model to elucidate the metabolic adaptation to low iron starvation and the  
79 subsequent impact of this response on pathogenesis. *P. aeruginosa* is a Gram-negative  
80 opportunistic pathogen of significant concern for hospital-acquired infections, diabetic foot  
81 wound infections, and cystic fibrosis lung infections (8-11). To overcome iron limitation in the  
82 host, *P. aeruginosa* induces the expression of numerous exotoxins and proteases that cause  
83 tissue damage and may release host cell iron stores (12-14), as well as multiple high affinity iron  
84 acquisition systems to scavenge iron from host iron-sequestering proteins (15). In aerobic  
85 environments, iron can be acquired via the synthesis and secretion of two distinct siderophores,  
86 pyoverdine and pyochelin, which scavenge oxidized ferric iron ( $\text{Fe}^{3+}$ ) from host proteins such as  
87 transferrin and lactoferrin (16). In anaerobic environments, reduced ferrous iron ( $\text{Fe}^{2+}$ ) is  
88 acquired through the inner membrane associated Feo transport system (17). In addition to these

89 labile iron transport systems, *P. aeruginosa* utilizes two non-redundant heme uptake systems,  
90 Has (heme assimilation system) and Phu (*Pseudomonas* heme uptake), to acquire host heme  
91 as an iron source (18). Studies have demonstrated a role for each of these systems in different  
92 infection models (19-22), highlighting iron as a central mediator of *P. aeruginosa* pathogenesis.

93 Iron starvation also induces expression of the PrrF small regulatory RNAs (sRNAs),  
94 which we have shown are required for acute murine lung infection (23). The PrrF sRNAs post-  
95 transcriptionally repress the expression of multiple iron-containing proteins, presumably by  
96 pairing with, destabilizing, and reducing translation of the encoding mRNAs (24, 25). Included in  
97 the PrrF regulon are iron- and heme-cofactored components of the tricarboxylic acid (TCA)  
98 cycle and oxidative phosphorylation pathways, which are central components of *P. aeruginosa*  
99 metabolism (24, 25). *P. aeruginosa* is able to grow well in low iron environments in spite of this  
100 downregulation, yet the strategies employed to compensate for the loss of these systems have  
101 yet to be identified (23). We postulate that this gap in knowledge is due in part to the previous  
102 reliance on RNA-centric approaches, such as microarray analyses, which are only able to  
103 identify transcriptional and some post-transcriptional regulatory effects of iron limitation. In  
104 contrast, proteomics can reveal the full scope of transcriptional, post-transcriptional,  
105 translational, and post-translational regulatory changes due to iron depletion, including those  
106 mediated by the PrrF sRNAs, providing a more comprehensive analysis of iron-dependent  
107 regulation.

108 Herein we used liquid chromatography-tandem mass spectrometry (LC-MS/MS) to  
109 quantify changes in the *P. aeruginosa* proteome in iron-depleted conditions. In addition to the  
110 expected decreases in proteins in the TCA cycle and oxidative phosphorylation, iron starvation  
111 induced a compensatory increase in proteins for the catabolism of branched chain and aromatic  
112 amino acids. Iron depletion also reduced the levels of proteins for sulfur assimilation and  
113 increased levels of proteins for iron-sulfur (Fe-S) cluster biogenesis. We further identified novel  
114 iron regulation of several zinc-responsive proteins, and we showed that iron depletion increases

115 levels of proteins for twitching motility. Subsequent proteomic analysis of the  $\Delta prrF$  mutant  
116 showed that iron regulation of several of these pathways is partially dependent on the PrrF  
117 sRNAs. Moreover, we identified PrrF complementarity with mRNAs encoding several novel iron-  
118 regulated proteins, suggesting direct post-transcriptional regulation of these pathways. These  
119 results provide the most comprehensive analysis of the *P. aeruginosa* iron starvation response  
120 to date, revealing novel strategies likely used by this pathogen to survive in the host and initiate  
121 infection.

122

## 123 **RESULTS**

124

125 **Proteomics reveals broad changes in metabolic proteins upon iron starvation.** To analyze  
126 protein expression changes in *P. aeruginosa* under high and low iron conditions, we performed  
127 quantitative label-free proteomics on reference strain PAO1 cultures grown in chelex-treated  
128 dialyzed tryptic soy broth (DTSB) supplemented with or without 100 $\mu$ M FeCl<sub>3</sub>. These growth  
129 conditions have been used for numerous *P. aeruginosa* iron regulatory studies, including  
130 previous GeneChip analyses of the iron starvation response (26) and PrrF regulation (24, 25).  
131 Moreover, DTSB is rich in amino acids, which have been shown to be abundant in disease  
132 states such as the cystic fibrosis (CF) lung and to promote the production of numerous iron-  
133 regulated virulence factors (27-29). Protein samples were purified preliminarily by size exclusion  
134 ultrafiltration, cleaved by trypsin, and subjected to differential expression analysis by nanoLC-  
135 ion mobility linked parallel MS, termed ultradefinition MS<sup>e</sup> (UDMS<sup>e</sup>). UDMS<sup>e</sup> is a data-  
136 independent acquisition method utilizing tandem mass spectrometry with traveling wave ion  
137 mobility that uses ion mobility drift time-specific collision energy profiles to enhance precursor  
138 fragmentation and depth of coverage (30). Subsequent informatics were used to identify  
139 proteins that were significantly ( $p < 0.05$ ) induced or repressed at least two-fold (equivalent to 1

140  $\log_2$  fold change, or LFC) upon iron starvation. The complete results of this analysis are  
141 provided in the supplementary materials (**Dataset S1**).

142 In total, we identified 309 proteins as induced by iron starvation, while 250 proteins were  
143 repressed upon iron starvation. Of these proteins, 240 of the induced and 226 of the repressed  
144 proteins upon iron starvation have not been reported as iron regulated in previously published  
145 studies (24-26, 31). Pathway analysis was performed on the KEGG database to determine what  
146 cellular activities and metabolic pathways were likely affected by changes in the iron-induced  
147 and iron-repressed proteins. As expected, these results demonstrated that iron starvation  
148 repressed proteins in numerous metabolic pathways. In contrast, proteins involved in iron  
149 acquisition, ketone body metabolism, and Type IV pilus-dependent motility were significantly  
150 increased under low iron conditions (**Table 1**). While some of these pathways were previously  
151 known to be iron-responsive, iron regulation of proteins in ketone body metabolism and  
152 twitching motility has not been described. A closer examination of this dataset as described  
153 below revealed several potential mechanisms for adapting to iron starvation, including changes  
154 in proteins for amino acid metabolism, Fe-S cluster biogenesis, and zinc homeostasis.

155

**Table 1. Iron regulated pathways of PAO1 identified through pathway analysis**

| <b>Pathway</b>                               | <b>p-value</b>      |
|----------------------------------------------|---------------------|
| <b>Downregulated in low iron</b>             |                     |
| Oxidative phosphorylation                    | $3 \times 10^{-14}$ |
| Microbial metabolism in diverse environments | $1 \times 10^{-4}$  |
| Tricarboxylic Acid Cycle                     | $3 \times 10^{-3}$  |
| Aminobenzoate degradation                    | $3 \times 10^{-3}$  |
| Metabolic pathways                           | $3 \times 10^{-3}$  |
| Polycyclic aromatic hydrocarbon degradation  | $4 \times 10^{-2}$  |
| <b>Upregulated in low iron</b>               |                     |
| Heme assimilation and utilization            | $4 \times 10^{-18}$ |
| Pyoverdine biosynthesis                      | $1 \times 10^{-14}$ |
| Pyochelin biosynthesis                       | $2 \times 10^{-4}$  |
| Ketone bodies synthesis and degradation      | $4 \times 10^{-2}$  |
| Type IV pilus-dependent motility             | $5 \times 10^{-2}$  |

156

157 **Proteomics verifies the classical *P. aeruginosa* iron starvation response.** The *P.*  
158 *aeruginosa* transcriptional response to iron starvation has been well characterized (20, 24-26,  
159 32). Expected changes include the upregulation of several iron uptake systems, including those  
160 for siderophore, heme, and ferrous iron uptake systems. In agreement with these previous  
161 studies, our results show that numerous proteins involved in siderophore-mediated iron uptake  
162 via pyoverdine and pyochelin were upregulated at least two-fold under low iron conditions  
163 (**Supplementary Materials, Table S1**). Key components of the heme acquisitions systems  
164 were also induced in low iron, including proteins in the heme acquisition system (HasR, HasA,  
165 and HasI), the heme outer membrane heme receptor PhuR, and the iron-regulated heme  
166 oxygenase HemO (**Supplementary Materials, Table S1**). Also in agreement with earlier  
167 transcriptional studies, we found that several iron-dependent proteins were down-regulated  
168 under iron starvation conditions, including the iron-cofactored superoxide dismutase SodB, the  
169 heme-cofactored catalase KatA, the iron storage protein bacterioferritin B, BfrB, and a putative  
170 bacterioferritin encoded by PA4880 (**Supplementary Materials, Table S1**). The anthranilate



171 degradative enzymes AntABC, which utilize an iron cofactor, were also downregulated upon  
172 iron starvation (24, 25), while the iron-activated AntR transcriptional activator of the *antABC*  
173 genes (24) was not detected in this study.

174 While many of the previously-identified transcriptional responses to iron starvation were  
175 evident in this dataset, we also noted some discrepancies between protein level changes in our  
176 study and previously reported changes in RNA levels. Specifically, some iron-regulated integral  
177 membrane proteins, such as FpvJ, FpvE, PhuU, HasE, and HasD, were not detected in our  
178 analysis, possibly due to either the insolubility or low abundance of these proteins. Also as  
179 expected, extracellular proteins such as exotoxin A and the secreted hemophore HasA were not  
180 detected, as the secreted proteome was not analyzed in the current study. We also noted that  
181 some iron-regulated genes encoding cytoplasmic proteins were detected but did not exhibit iron  
182 regulation at the protein level. This included the HasS antisigma factor, which is predicted to  
183 regulate the Has heme assimilation system (33), and the AprA protease, which functions to  
184 modulate the host immune response (34) (**Supplementary Materials, Table S1**). One  
185 explanation for this discrepancy is that these proteins are subject to additional translational or  
186 post-translational regulatory mechanisms that mask the previously-observed transcriptional iron  
187 regulatory responses.

188

### 189 ***P. aeruginosa* induces multiple iron-sparing metabolic pathways during iron starvation.**

190 Previous microarray studies demonstrated reduced expression of multiple iron-containing TCA  
191 cycle enzymes under iron limiting conditions (24-26). In agreement with these studies, we  
192 observed a reduction in the TCA cycle enzymes citrate synthase (GltA), aconitase (AcnA and  
193 AcnB), and succinate dehydrogenase (SdhCDAB) (**Fig. 1A, and Supplementary Materials,**  
194 **Fig S1A**). However, it remained unclear how iron starved cells metabolically compensate for the  
195 reduced expression of these enzymes. One possibility was that *P. aeruginosa* shifts its  
196 metabolism to utilize the glyoxylate shunt, which was recently observed in iron depleted M9

197 medium (35). While we observed a significant upregulation of the isocitrate lyase AceA, we also  
198 observed a significant downregulation of the malate synthase GlcB under low iron conditions  
199 (**Supplementary Materials, Table S1**). Thus, it does not appear that the glyoxylate shunt is the  
200 primary means of metabolism under iron-starved conditions in an amino acid rich medium (**Fig**  
201 **1A, and Supplementary Materials, Fig S1A**).

202 Our data instead indicate that *P. aeruginosa* shifts to amino acid catabolism under low  
203 iron conditions. The enzymes that comprise the aromatic amino acid degradation pathway,  
204 which converts phenylpyruvate, phenylalanine, and tyrosine into fumarate, were almost all  
205 significantly upregulated above our two-fold threshold (**Fig 1A, and Supplementary Materials,**  
206 **Fig S1A**). Notably, the entry of these metabolites into the TCA cycle takes advantage of the  
207 iron-independent paralog of fumarate hydratase (FumC1) (36) and probable iron-independent  
208 paralog of malate:quinone oxidoreductase (MqoA), both of which were upregulated under low  
209 iron conditions (**Fig. 1A, and Supplementary Materials, Fig S1A**). Our pathway analysis also  
210 indicated proteins involved in ketone body metabolism, a process that degrades fatty acids and  
211 branched chain amino acids to allow fasting in higher organisms, were induced upon iron  
212 limitation. Ketone body metabolism has not been reported in prokaryotes, but we did observe  
213 increased levels of proteins for ketogenic amino acid metabolism. Specifically, several enzymes  
214 for leucine catabolism (Ldh, BkdA1, BkdB, LiuD, and LiuE) were significantly upregulated at  
215 least 1.5-fold (0.5 LFC) in low iron conditions (**Fig. 2A, and Supplementary Materials, Fig**  
216 **S2A**). Conversely, several proteins involved branched chain amino acid biosynthesis (IlvE, IlvD  
217 and LeuC) were down-regulated in low iron conditions (**Fig. 2B, and Supplementary Materials,**  
218 **Fig S2**). Combined, these data suggest *P. aeruginosa* shifts to amino acid catabolism upon iron  
219 starvation to support its metabolism.

220 We also observed modest but significant increases in proteins that synthesize L-  
221 ornithine from glutamate and acetyl-CoA (ArgA, ArgB, ArgC, and AruC) (28) (**Fig 2A, and**  
222 **Supplementary Materials, Fig S2A**). The idea that the cell is metabolizing glutamate to form L-

223 ornithine is attractive, as the DTSB medium used for this study is supplemented with an excess  
224 of mono-sodium glutamate as a nitrogen source, and ornithine is needed for pyoverdine  
225 production (22). Interestingly, the ArcD L-ornithine/arginine antiporter, and ArgF, which  
226 incorporates ornithine into the arginine biosynthesis pathway, were both significantly  
227 downregulated in iron-depleted conditions (**Fig 2A, and Supplementary Materials, Fig S2A**).  
228 This could be part of an ornithine sparing response for pyoverdine biosynthesis, further  
229 supported by the upregulation of the first pyoverdine biosynthetic enzyme PvdA  
230 (**Supplementary Materials, Table S1**). This possible metabolite sparing strategy to promote  
231 pyoverdine synthesis is similar to the previously-described down-regulation of the AntABC  
232 anthranilate degradation enzymes to promote 2-alky-4(1*H*)-quinolones (AQs) under low iron  
233 conditions (24, 37).

234 As previously reported, we also observed decreased levels of several iron-dependent  
235 proteins involved in oxidative phosphorylation in low iron conditions (**Supplementary Materials,**  
236 **Table S1**) (24-26). In contrast, levels of the lower affinity cytochrome ubiquinol oxidase CyoA,  
237 part of the CyoABCDE complex that is less reliant on iron (38), were increased in low iron  
238 (**Supplementary Materials, Table S1**). CyoBCDE were not detected, possibly due to their  
239 insolubility as integral membrane proteins. Low iron also resulted in a 1.7 LFC of PA2691  
240 (**Supplementary Dataset S1**), which is a predicted type II NADH:quinone oxidoreductase  
241 (NDH-2). NDH-2 proteins utilize flavin cofactors instead of iron to catalyze the oxidation of  
242 NADH and reduce quinones (39). Thus, PA2691 may function in place of the *nuoA-N* encoded  
243 complex I to oxidize NADH under low iron conditions. These data outline a strategy wherein *P.*  
244 *aeruginosa* shifts production of enzymes for oxidative phosphorylation pathways to support iron-  
245 sparing respiratory metabolism.

246

247 **Iron regulates proteins for sulfur acquisition and metabolism.** Sulfur is a key component of  
248 Fe-S clusters, which are incorporated into many metabolic enzymes. This and other studies

249 have shown that numerous Fe-S containing proteins are downregulated during iron-depleted  
250 growth (24, 25). It is therefore possible that *P. aeruginosa* alters pathways for the uptake and  
251 metabolism of sulfur in response to changing iron availability. In agreement with this hypothesis,  
252 proteins with demonstrated and putative roles in alkanesulfonate uptake (SsuA, PA2594, and  
253 PA2595), as well as the alkanesulfonate monooxygenases PA2600 and SsuD, were reduced in  
254 low iron conditions (**Fig. 3A, and Supplementary Materials, Fig S3A-B**). Moreover, iron  
255 limitation resulted in decreased levels of several proteins involved in cysteine biosynthesis from  
256 sulfate, including CysD, CysN, CysI, CysH, and PA2600 (**Fig. 3A, and Supplementary**  
257 **Materials, Fig S3A-B**). While the CysK and CysM enzymes that catalyze the final steps of  
258 cysteine biosynthesis were not affected by iron depletion in our study, decreases in proteins that  
259 mediate the earlier steps in this pathway strongly suggest that *P. aeruginosa* reduces sulfur  
260 assimilation and cysteine biosynthesis pathways under low iron conditions.

261 Interestingly, almost all of the known proteins involved with Fe-S cluster biosynthesis,  
262 including IcsR, HscAB, IcsX, and the potential iron donor CyaY (40), were significantly  
263 upregulated in iron-depleted conditions (**Fig. 4**). In contrast, IcsU, which is encoded on the  
264 same operon as other Fe-S synthesis proteins, was significantly downregulated in iron-depleted  
265 conditions. Differential impacts of iron on proteins encoded by the *Isc-hsc-fox* operon may be  
266 due to either dis-coordinate post-transcriptional regulatory activities or differences in protein  
267 half-life. We also identified a partial Suf-like locus encoding a SufS-like desulfurase, PA3668,  
268 and a SufE-like sulfur transport protein, PA3667, both of which were significantly upregulated in  
269 low iron conditions (**Fig. 4**). The upregulation of the SufE-like protein (PA3667) may be able to  
270 compensate for the reduced levels of IscU in low iron conditions (**Fig. 4B**). Overall, these results  
271 indicate that *P. aeruginosa* upregulates Fe-S cluster biosynthesis proteins in low iron conditions,  
272 despite the global downregulation of Fe-S cluster containing proteins. This response to iron  
273 starvation has previously been reported for the *suf* locus in *Escherichia coli* (41), and is thought  
274 to be necessary to maintain Fe-S cluster biogenesis for essential proteins. Thus, these results

275 suggest a central requirement for Fe-S cluster biogenesis in *P. aeruginosa* metabolism even  
276 under conditions of iron starvation.

277

278 **Proteins for phenazine biosynthesis are repressed in iron-poor conditions.** Phenazines  
279 are redox active secondary metabolites that contribute to biofilm formation, act as extracellular  
280 electron acceptors, and exhibit antimicrobial properties (42-45). Biosynthesis of phenazine-1-  
281 carboxylic acid (PCA) from chorismate is performed by enzymes encoded by two almost  
282 identical operons, *phzA1-phzG1* (*phz1*) and *phzA2-G2* (*phz2*) (46) (**Fig 5A**). The two redundant  
283 operons have been shown to be regulated independently and have different roles in  
284 pathogenicity, with the *phz2* operon required and sufficient for pathogenesis (48).

285 PCA can be further modified by PhzH to produce phenazine-1-carboxamide (PCN), by PhzS to  
286 produce 1-hydroxyphenazine (1-OH-PHZ), or by PhzM to produce 5-methylphenazine-  
287 carboxylic acid (5-Me-PCA), from which pyocanin (PYO) is produced by PhzS (**Fig. 5A**). Many  
288 but not all of these biosynthetic proteins, as well as the MexGHI-OmpD multi-drug efflux pump  
289 that is required for secreting phenazines into the environment, were significantly reduced in low  
290 iron conditions (**Fig. 5A**) (47). The amino acid sequences of the enzymes encoded by the two  
291 operons are 100% identical from PhzC-PhzG, so only PhzA1/A2 and PhzB1/B2 could be  
292 differentiated by proteomic analysis. Though unique peptides were identified to distinguish the  
293 PhzA1 and PhzA2 proteins, the extracted-ion chromatogram (XIC) quality of these unique  
294 peptides was not sufficient for differential quantification. Therefore we differentiated the  
295 expression of the two operons using PhzB expression: PhzB2 was significantly repressed under  
296 low iron conditions, while PhzB1 was not affected by iron (**Fig. 5C**). Based on these data, we  
297 hypothesize that iron specifically regulates proteins encoded by the *phz2* operon, though further  
298 studies will be necessary to thoroughly test this hypothesis.

299

300 **Structural and regulatory proteins for twitching motility are increased under low iron**  
301 **conditions.** Previous work demonstrates that *P. aeruginosa* limits motility in high iron conditions  
302 to promote biofilm formation, while iron starvation induces twitching motility (49, 50). However,  
303 microarray studies have not identified iron regulation of the genes that encode the twitching  
304 motility apparatus (26). Here we show that many of the proteins comprising the pilus required  
305 for twitching motility are significantly increased upon iron starvation. This includes the PilM and  
306 PilN proteins in the alignment complex, the major pilus subunit PilA, and almost all of the minor  
307 pillin subunits (**Fig.6A**). Several of the proteins involved in the twitching-specific chemosensory  
308 system, including PilG, PilH, and ChpC, are also upregulated in iron-depleted conditions  
309 (**Fig.6A**). To our knowledge, this is the first demonstration of iron-regulated levels of the proteins  
310 involved in twitching motility.

311         The induction of twitching motility proteins in this experiment was particularly interesting  
312 as this experiment was performed with shaking cultures, and pili-mediated twitching motility  
313 occurs during static growth on solid or semi-solid surfaces. To confirm that iron would have a  
314 similar effect on twitching motility on solid DTSB medium, twitching motility assays were  
315 performed in DTSB agar plates with and without 100uM iron supplementation. In agreement  
316 with previous studies, the twitching diameter for wild type PAO1 was significantly larger under  
317 low iron conditions than high iron conditions (**Fig. 6B and Supplementary Materials, Fig. S3**).  
318 Combined, these data demonstrate that increased twitching in low iron conditions is likely due to  
319 increased levels of many components of the Type IVa pili machinery.

320  
321 **Proteomics reveals regulatory crosstalk between iron and zinc.** As discussed above, iron  
322 starvation in *P. aeruginosa* results in the induction of iron-independent paralogs of certain  
323 metabolic enzymes (e.g. FumC and Mqo-mediated reactions in **Fig. 1A**). In some cases, these  
324 enzymes rely on other transition metals, such as zinc and manganese, to support their structure  
325 or activity. Thus, one possible strategy to compensate for iron starvation may be to induce

326 pathways for the uptake of other transition metal ions. In support of this idea, our data  
327 demonstrate that iron limitation results in increased levels of proteins encoded by the *cnt* operon,  
328 which mediate the synthesis, secretion, and uptake of a novel opine metallophore involved in  
329 zinc uptake (**Fig 7A-B**). Interestingly, CntL, the nicotianamine synthase (51), was not  
330 statistically increased by iron depletion, and Cntl, the predicted cytoplasmic membrane exporter  
331 of pseudopaline (52), was not detected. Our finding that CntL protein levels are not affected by  
332 iron depletion is consistent with a recent study detailing the role of pseudopaline in zinc uptake  
333 (52). Notably, analysis of the *cntO* mRNA by real time PCR (qPCR) demonstrated that the  
334 operon is induced under low iron conditions (**Supplementary Materials, Fig S4**). Therefore, the  
335 variable impacts of iron on Cnt protein levels observed in the present study may be due to post-  
336 transcriptional regulatory mechanisms. These results are consistent with what has been found  
337 for the structurally similar staphylopine metallophore produced by *Staphylococcus aureus*,  
338 which is regulated both by both iron and zinc (53), suggesting that upregulation of zinc uptake  
339 upon iron starvation is a widespread phenomenon.

340 Our results also showed significant upregulation of the zinc uptake regulator Zur, as well  
341 as proteins encoded by several genes found to be upregulated in response to  $\Delta znuA$  induced  
342 zinc starvation (54). These include AmiA, encoding an N- acetylmuramoyl-L-alanine amidase  
343 (55), and several uncharacterized proteins (PA5534, PA5535, and PA2911) (**Fig. 7C**). The AmiA  
344 protein in *E. coli* has a strict requirement for zinc (56). Due to the fact that the *P. aeruginosa*  
345 AmiA is downregulated under low iron conditions and upregulated under low zinc conditions, it  
346 is possible that AmiA is able to use a different metal in *P. aeruginosa*. While most N-  
347 acetylmuranomoyl-L-alanine amidases have a strict zinc requirement, more permissive N-  
348 acetylmuranomoyl-L-alanine amidases have been identified (57). Additional zinc-responsive  
349 proteins that were induced in iron-depleted conditions included PA5534, PA5535, and PA2911  
350 (**Fig. 7C**). PA5535 is a member of the COG0523 subfamily of the G3E family of P-loop  
351 GTPases, which is comprised of metallochaperones and metal-insertases. PA2911 was

352 predicted to be part of an iron ABC permease, but it has been previously shown to be zinc  
353 regulated with a putative Zur box. Combined, these data suggest that *P. aeruginosa* responds to  
354 iron starvation by modulating the expression of other transition metal homeostasis pathways.  
355  
356 **PrrF mediates iron-regulated changes in multiple iron sparing pathways.** The PrrF sRNAs  
357 play a significant role in mediating post-transcriptional iron regulation of metabolic processes  
358 and virulence in *P. aeruginosa* (23-25, 58). We therefore sought to determine if any of the novel  
359 iron regulatory activities uncovered in our proteomics study were dependent upon the PrrF  
360 sRNAs. This was achieved by repeating the proteomics experiment with the wild type PAO1  
361 strain and isogenic  $\Delta prrF$  mutant grown in DTSB medium with or without iron supplementation  
362 (25). Pathway analysis was performed on all proteins that were significantly ( $p < 0.05$ ) induced  
363 or repressed at least two-fold ( $|\text{LFC}| \geq 1$ ). Consistent with previous studies (24, 25) and our first  
364 proteomics dataset (**Supplementary Materials, Dataset S1**), this analysis demonstrated loss of  
365 iron regulation of several iron-dependent pathways in the  $\Delta prrF$  mutant, including oxidative  
366 phosphorylation, respiratory electron transport chain, the TCA cycle, and carbohydrate  
367 metabolic processes (**Table 2**). Some inconsistencies in iron-regulated pathways between the  
368 two experiments were noted, including a lack of iron regulation of the heme acquisition and  
369 ketone body synthesis like pathways (compare **Table 1** and **Table 2**). This is likely due to  
370 changes in the DTSB media composition between the two experiments, as a result of the  
371 variability of TSB batches and differences that can occur during dialysis of the media (see  
372 Materials and Methods). However, the results of this later experiment were largely consistent  
373 with the first experiment (see the heat maps in **Fig. 1-7**), demonstrating the overall  
374 reproducibility of our reported results.

375



**Table 2. Iron regulated pathways of  $\Delta prrF1,2$  identified through pathway analysis**

| Pathway                                        | p-value             |                    |
|------------------------------------------------|---------------------|--------------------|
|                                                | PAO1                | $\Delta prrF1,2$   |
| <b>Downregulated in low iron</b>               |                     |                    |
| Sulfur metabolism                              | $1 \times 10^{-2}$  | $3 \times 10^{-2}$ |
| Generation of precursor metabolites and energy | $6 \times 10^{-7}$  | $6 \times 10^{-3}$ |
| Oxidative phosphorylation                      | $2 \times 10^{-4}$  | NS <sup>1</sup>    |
| Respiratory electron transport chain           | $1 \times 10^{-3}$  | NS <sup>1</sup>    |
| Tricarboxylic acid cycle                       | $7 \times 10^{-3}$  | NS <sup>1</sup>    |
| Carbohydrate metabolic process                 | $5 \times 10^{-2}$  | NS <sup>1</sup>    |
| <b>Upregulated in low iron</b>                 |                     |                    |
| Pyoverdine biosynthesis                        | $1 \times 10^{-14}$ | $1 \times 10^{-7}$ |

<sup>1</sup>NS not significant,  $p > 0.05$

376

377 Notably, this second dataset showed that iron induction of several proteins within newly  
378 identified iron-activated pathways was dependent upon the *prrF* locus. Specifically, iron  
379 activation of these proteins was lost in the  $\Delta prrF$  mutant, and we observed an increase in the  
380 levels of these proteins in the  $\Delta prrF$  mutant compared to wild type when grown under low iron  
381 conditions proteins. As expected, PrrF-dependent iron regulation was observed for all previously  
382 identified iron-regulated TCA cycle proteins, with the exception of SdhB (**Fig. 1**), as well as for  
383 multiple other proteins encoded by PrrF-regulated mRNAs (**Supplementary Materials, Dataset**  
384 **S1**). We additionally found that iron regulation of the branched chain amino acid biosynthesis  
385 proteins IlvA1 and IlvD was dependent on the *prrF* locus (**Fig. 2**), as well as several proteins for  
386 sulfur metabolism (SsuF, SsuA, CysH, CysN, and CysD; **Fig. 3**) and Fe-S cluster biosynthesis  
387 proteins (IscU, and IscS; **Fig. 4**). We further identified novel PrrF regulation of the PhzA  
388 phenazine biosynthetic proteins (**Fig 5**), although it was unclear whether PrrF regulation was  
389 occurring through regulation of one or both *phzABCDEFG* transcripts due to the high identity of  
390 the encoded proteins. Lastly, we observed PrrF-dependent iron regulation of the zinc-  
391 responsive PA5535 and PA5534 proteins (**Fig. 7**). Combined, these results show an even  
392 broader impact of PrrF-dependent regulation on iron and metabolite sparing pathways than was

393 previously appreciated, and they highlight a novel role for these sRNAs in mediating metallo-  
394 regulatory cross-talk in in *P. aeruginosa*.

395

396 **The PrrF sRNAs share complementarity with mRNAs encoding several iron- and PrrF-**

397 **responsive proteins.** To determine whether PrrF is likely to mediate direct regulation of the

398 iron-regulated pathways in this study, we employed CopraRNA (59) to search for

399 complementarity between the PrrF sRNAs and mRNAs encoding PrrF-regulated proteins. Our

400 analysis revealed significant regions of complementarity between the PrrF sRNAs and mRNAs

401 for the TCA cycle enzymes SdhC, PA4333, and PA0794 (**Fig. 1C-E**), none of which were

402 identified as sharing complementarity with the PrrF sRNAs in previous studies. We also

403 identified PrrF complementarity with the mRNA encoding IlvD, which catalyzes two distinct

404 reactions in the branched chain amino acid biosynthesis pathway (**Fig. 2D**). We further

405 identified PrrF complementarity with the mRNA encoding CysD (**Fig. 3C**), encoding the first step

406 in sulfate assimilation into cysteine, and at the 5' end of *iscS* (**Fig. 4D**). The location of

407 complementarity at the 5' end of *iscS* is consistent with the discoordinate regulation of the Isc

408 proteins observed in our proteomics analyses (**Fig. 4A,C-D**) and is also consistent with

409 discoordinate regulation of the *isc* regulon in *E. coli* by the iron-responsive RyhB sRNA (7).

410 Lastly, we identified PrrF complementarity with the 5' UTR and into the coding region of the

411 PA5535 mRNA (**Fig. 7D**), encoding a putative metal chaperone that is induced upon zinc

412 starvation (54, 60) and repressed upon iron starvation (**Fig. 7B-C**). The location of

413 complementarity with the *dksA*-PA5535-PA5534 operon is consistent with the observed

414 discoordinate regulation of these proteins by iron and PrrF, as DksA2 levels were not affected

415 by iron or *prrF* deletion (**Fig. 7B-C**). Combined, these analyses demonstrate the capacity for

416 PrrF to directly interact with mRNAs coding for proteins involved in zinc homeostasis, Fe-S

417 biogenesis, and amino acid metabolism.

418

419 **The PrrF sRNAs positively regulate twitching motility.** In addition to mediating iron-induced  
420 expression of several metabolic and metal homeostasis pathways, the *prrF* locus mediated iron-  
421 dependent repression of several twitching motility proteins. Specifically, iron repression of the  
422 minor pilins PilE, and FimU, as well as a twitching-associated protein of unknown function PilY2,  
423 was eliminated in the  $\Delta$ *prrF* mutant, and the levels of these proteins were reduced in the  $\Delta$ *prrF*  
424 mutant as compared to wild type grown in low iron conditions (**Fig 6C**). The minor pilin proteins  
425 play a key role in initiating twitching motility (61), suggesting the *prrF* locus is required for this  
426 activity. In support of this hypothesis, the  $\Delta$ *prrF* mutant exhibited decreased motility when  
427 compared to wild type PAO1 (**Fig. 6B and Supplementary Materials, Fig. S3**). Moreover, iron  
428 regulation of twitching motility was abolished in the  $\Delta$ *prrF* mutant. (**Fig. 6B and Supplementary**  
429 **Materials, Fig. S3**). Thus, our results demonstrate that the *prrF* locus is critical for iron-  
430 regulated twitching motility in *P. aeruginosa*, highlighting a novel role for these sRNAs in *P.*  
431 *aeruginosa* physiology and virulence.

432

## 433 **DISCUSSION**

434 *P. aeruginosa* is a versatile opportunistic pathogen that is able to thrive in a variety of  
435 nutrient limited environments, including the mammalian host. Despite this organism's high  
436 metabolic iron requirement, *P. aeruginosa* grows proficiently in iron-depleted conditions. This is  
437 due in part to the presence of numerous high affinity iron acquisition systems (15), as well as a  
438 robust iron-sparing response mediated by the PrrF sRNAs (24, 25). The PrrF sRNAs are  
439 already known to contribute to growth in iron limited environments, including the host, as  
440 evidenced by multiple studies from our group (23, 58, 62). While the PrrF sRNAs were known to  
441 post-transcriptionally repress the expression of non-essential iron-containing proteins to  
442 moderate the use of this nutrient, it remained unclear how *P. aeruginosa* could maintain robust  
443 growth upon reductions in these pathways. The current study indicates that *P. aeruginosa* uses  
444 multiple strategies to compensate for the downregulation of iron containing proteins, including

445 increased production of iron-independent metabolic proteins, metabolite sparing strategies to  
446 prioritize production of virulence factors, and increased reliance on zinc as a metal cofactor.  
447 Moreover, our study demonstrates that the PrrF sRNAs are responsible for several aspects of  
448 these newly-identified responses, providing a mechanistic basis for how *P. aeruginosa* responds  
449 to iron starvation. Lastly, our study establishes a novel role for the PrrF sRNAs in iron regulation  
450 of twitching motility, providing a potential mechanistic basis for this long-observed phenomenon.  
451 As such, this study provides a comprehensive view of how *P. aeruginosa* adapts to iron-limited  
452 environments such as the host, and outlines new models for how the PrrF sRNAs contribute to  
453 pathogenesis.

454         One of the overarching themes highlighted by our study is the upregulation of iron-  
455 sparing metabolic pathways to compensate for the downregulation of iron-rich metabolic  
456 pathways. For example, we show for the first time that iron starvation results in increased  
457 production of a putative NADH dehydrogenase, and we confirm the increased production of a  
458 cytochrome ubiquinol oxidase (31), which may compensate for PrrF-mediated downregulation of  
459 oxidative phosphorylation proteins. The Cyo respiratory pathway uses less iron and can be used  
460 without the cytochrome *bc*<sub>1</sub> complex (complex III) while retaining the ability to generate a proton  
461 motive force by pumping H<sup>+</sup> into the periplasm (63, 64), and PA2691 encodes a putative type II  
462 NADH:quinone oxidoreductase that can regenerate NAD<sup>+</sup> and maintain redox homeostasis.  
463 Together, the Cyo complex and PA2691 have the potential to compensate for the  
464 downregulation of the oxidative phosphorylation pathway. The Cyo complex (*bo*<sub>3</sub>-type) is one of  
465 five terminal oxidases utilized by *P. aeruginosa*. The others are expressed under starvation  
466 (*aa*<sub>3</sub>-type), under high (*cbb*<sub>3</sub>-1 type) or low oxygen (*cbb*<sub>3</sub>-2 type), and under copper limitation  
467 (copper independent oxidase, CIO) (63). It was previously shown that *cyoA* expression  
468 increases under low iron conditions via loss of Fur repression (31), most likely due to requiring  
469 less iron than the other four oxidases. Under iron-replete conditions, the NADH dehydrogenase  
470 I, comprised of NuoA-N, is the predominant NADH dehydrogenase as it not only recycles NADH

471 to NAD<sup>+</sup> but also helps to generate a proton motive force that can be used to generate ATP (39).

472 Likewise, the *cbb*<sub>3</sub>-type cytochrome oxidases are the predominant terminal oxidases, as they  
473 interact with the cytochrome *bc*<sub>1</sub> complex, which also contributes to the proton motive force (63).

474         Also for the first time, this study shows that *P. aeruginosa* upregulates enzymes in  
475 multiple amino acid catabolic pathways when grown in iron-depleted conditions, potentially to  
476 compensate for reduced expression of iron-containing TCA cycle enzymes. Pathway analysis  
477 identified proteins for ketogenic amino acid metabolism as induced during iron starvation. While  
478 ketone body metabolism has not been described in prokaryotes, the induction of branched chain  
479 amino acid degradation could indicate a similar metabolic strategy to eukaryotic ketogenesis in  
480 response to limited TCA cycle activity. It is likely that the switch to amino acid catabolism is a  
481 media-dependent phenomenon, as DTSB is rich in amino acids, which could support this  
482 alternative metabolism. This shift is dependent in part on the PrrF sRNAs, which share  
483 extensive complementarity with the *ilvD* mRNA and are required for iron-dependent regulation  
484 of IlvD and IlvA (**Fig 2D**). A similar shift to amino acid catabolism has been observed in clinical  
485 isolates from CF infections as indicated by amino acid auxotrophic mutants (27, 29, 65). These  
486 mutants are believed to have lost the ability to synthesize amino acids such as methionine,  
487 isoleucine, valine, and leucine, due to the abundance of these amino acids in CF sputum. Host  
488 amino acid metabolism is also altered by inflammation (66, 67), potentially contributing the pool  
489 of available amino acids in the lung. In this way, inflammation resulting from chronic infection  
490 may aid *P. aeruginosa* colonization. Indeed, increased amino acid concentrations are correlated  
491 with increased severity of pulmonary disease in CF patients (29). We also found that proteins  
492 for amino acid biosynthesis were downregulated upon iron starvation, providing further evidence  
493 that *P. aeruginosa* catabolizes amino acids for energy, similar to what is observed during CF  
494 lung infections. Thus, iron may play a critical role in the shift of *P. aeruginosa* metabolism  
495 toward amino acid catabolism during chronic infection.

496 In addition to aiding in metabolism, the downregulation of cysteine biosynthesis upon  
497 iron depletion may impact the production of Fe-S clusters as cysteine is used as the sulfur  
498 donor. Fe-S cluster biosynthesis is mediated by the *iscRSUA-hscBA-fdx2-iscX* operon, which  
499 we show here to be discoordinately regulated by iron. Northern blot analysis of the *iscRSUA-*  
500 *hscBA-fdx2-iscX* operon by Romsang, *et al*, showed that these genes in *P. aeruginosa* are  
501 transcribed as an operon (68). However, whether these genes are transcribed as an operon  
502 under our conditions, or if there is differential regulation of translation by the resulting mRNA  
503 transcript, is unknown. In *E. coli*, the *isc* operon is transcribed separately from the *hscBA-fdx2-*  
504 *iscX* operon (41). Thus, it is possible that there is a second promoter resulting in increased  
505 expression of HscB, HscA, and IscX independent of the proteins encoded by the upstream  
506 genes. The mechanism of the repression of IscS and IscU under low iron conditions is likely  
507 attributed to the PrrF sRNAs due to their homology with the *iscS* mRNA translational start site  
508 and derepression in  $\Delta prrF$  (**Fig. 4**). To compensate for the downregulation of the desulfonase  
509 IscS and the scaffold protein IscU, we identified a partial Suf-like operon encoding a  
510 desulfonase, PA3668, and a scaffold protein, PA3667, both of which were upregulated under  
511 low iron conditions. In *E. coli* the *isc* operon is considered the housekeeping Fe-S cluster  
512 biogenesis operon, but under oxidative stress or low iron conditions the *suf* operon is expressed  
513 (41). Our data suggest *P. aeruginosa* uses a similar strategy to maintain limited Fe-S cluster  
514 biogenesis under low iron conditions.

515 The rewiring of metabolic networks that is suggested by our proteomics study also  
516 appears to contribute to alterations in virulence factor production. We show that iron starvation  
517 downregulates several proteins in the phenazine biosynthesis proteins, and that the PrrF sRNAs  
518 negatively affect levels of PhzA, encoded by the first gene in the *phzA-F* operons. No  
519 complementarity was identified between the PrrF sRNAs and either of the *phzA* genes or  
520 upstream sequence; thus the mechanism for the regulation by PrrF is currently unknown and  
521 should be studied more in the future. A possible reason for downregulation of the phenazines

522 under low iron conditions may be to spare chorismate for the production of the siderophore  
523 pyoverdine. This metabolite sparing phenomenon was also previously observed with PrrF  
524 repression of *antR*, which results in decreased degradation of anthranilate to feed into the TCA  
525 cycle, sparing anthranilate for the production of multiple secreted 2-alkyl-4(1*H*)-quinolone  
526 metabolites. A further potential example of metabolite sparing for the production of virulence  
527 factors is the downregulation of ArgF, which feeds ornithine into the arginine biosynthesis  
528 pathway, and the upregulation of PvdA, which incorporates ornithine into pyoverdine. As  
529 discussed in the results, ornithine biosynthesis also appears to be upregulated in low iron  
530 conditions, possibly to produce enough ornithine for sufficient pyoverdine production.

531 Many studies have demonstrated that twitching motility increases under low iron  
532 conditions, while high iron allows for sessile growth and biofilm formation (50). However, iron-  
533 dependent regulation of the genes encoding the twitching motility apparatus has not previously  
534 been observed. Here we show that iron starvation increases the levels of several structural  
535 components of the twitching apparatus, as well as the major and minor pilin proteins. The fact  
536 that these processes have not been identified in previous transcriptional studies could be due to  
537 multiple factors, including differences in mRNA and protein half-life or mismatch between  
538 transcription peak and sampling time. Alternatively, these results may indicate a role for post-  
539 transcriptional regulatory activities. This latter hypothesis is supported by our subsequent  
540 studies of the  $\Delta prrF$  mutant, which lacked the ability to mediate iron regulated twitching motility  
541 (**Fig. 6**), highlighting a novel mechanism for how iron may regulate the switch from planktonic to  
542 biofilm growth. Future studies will be needed to determine the mechanism by which PrrF  
543 promotes the expression of iron-regulated twitching motility proteins.

544 One notable and somewhat surprising result of our study was iron-dependent regulation  
545 of numerous proteins encoded by zinc starvation induced genes, indicating the iron and zinc  
546 homeostasis systems in *P. aeruginosa* are integrated. Specifically, the upregulation of proteins  
547 in the pseudopaline metallophore system highlights a novel strategy for overcoming iron

548 starvation through the increased expression of zinc acquisition systems. The *cnt* operon is  
549 negatively regulated by zinc through the Zur protein via a Zur box in the *cnt* promoter. Thus, it  
550 was surprising that this up-regulation occurred when Zur protein levels were also increased  
551 under these conditions. One possible explanation for these data is that zinc levels were below  
552 the necessary threshold for Zur-dependent repression of the *cnt* operon. In addition to Zur and  
553 the pseudopaline proteins, we identified iron regulation of proteins encoded by previously  
554 identified zinc-repressed genes: PA5535, PA5534, AmiA, and PA2911 were all induced upon  
555 zinc starvation in an earlier study (54), and they were all repressed by iron starvation in our  
556 study. We further found evidence for direct discoordinate PrrF regulation of the *dksA2*-PA5535-  
557 PA5534 operon, which itself is directly repressed by Zur (54, 70). The interconnection of metal  
558 homeostasis systems has not been shown for *P. aeruginosa* but has been shown for other  
559 organisms like *Bacillus subtilis* (71). This phenomenon is therefore likely widespread across  
560 bacteria and warrants further study in *P. aeruginosa*.

561 In closing, this study has dramatically increased our understanding of how *P. aeruginosa*  
562 regulates metabolism, virulence, and metal homeostasis in response to iron starvation. Previous  
563 work has characterized the PrrF dependent iron sparing response, but here we have identified  
564 compensatory changes that allow *P. aeruginosa* to continue to thrive when this nutrient is  
565 lacking. Further, our results outline several novel roles for the PrrF sRNAs in the iron sparing  
566 response, cementing their role as global regulators of metabolism, virulence, and metal  
567 homeostasis. With the demonstrated role of iron and the PrrF sRNAs in pathogenesis, these  
568 findings will contribute to an increased understanding of how iron regulatory pathways promote  
569 *P. aeruginosa* survival in the mammalian host.

570

## 571 **MATERIALS AND METHODS**

572



573 **Growth conditions.** *Pseudomonas aeruginosa* reference strain PAO1 (72) and the isogenic  
574  $\Delta prrF$  mutant (25) were grown in chelex treated dialyzed tryptic soy broth (DTSB) supplemented  
575 with 50mM monosodium glutamate and 1% glycerol prepared as previously described (24)  
576 supplemented with or without 100  $\mu\text{M}$   $\text{FeCl}_3$ . Cultures were grown at 37°C shaking at 250 rpm.  
577 Cells were harvested after 18 hours of growth, the supernatant was removed, and the pellets  
578 were stored at -80°C.

579

580 **Quantitative label-free proteomics.** Cells were lysed in 4% sodium deoxycholate after  
581 washing in phosphate-buffered saline. Lysates were washed, reduced, alkylated and  
582 trypsinolyzed in filter as previously described (73, 74). Tryptic peptides were separated on a  
583 nanoACQUITY UPLC analytical column (BEH130 C18, 1.7  $\mu\text{m}$ , 75  $\mu\text{m}$  x 200 mm, Waters) over  
584 a 180 min linear acetonitrile gradient (3 – 43%) with 0.1% formic acid on a Waters nano-  
585 ACQUITY UPLC system and analyzed on a coupled Waters Synapt G2S HDMS mass  
586 spectrometric system. Spectra were acquired using a data-independent tandem mass  
587 spectrometry with traveling wave ion mobility method termed ultradefinition MS<sup>e</sup> (UDMS<sup>e</sup>).  
588 Spectra were acquired using this ion mobility linked parallel mass spectrometry (UDMS<sup>e</sup>) and  
589 analyzed as described by Distler *et al.* (30). Peaks were resolved using Apex3D and Peptide3D  
590 algorithms (75). Tandem mass spectra were searched against a PAO1 reference proteome (76)  
591 and its corresponding decoy sequences using an ion accounting algorithm (77). Resulting hits  
592 were validated at a maximum false discovery rate of 0.04. Peptide abundance ratios between  
593 the cells cultured in the high iron medium and the cells cultured in low iron medium were  
594 measured by comparing the MS1 peak volumes of peptide ions at the low collision energy cycle,  
595 whose identities were confirmed by MS2 sequencing at the elevated collision energy cycle as  
596 described above. Label-free quantifications were performed using an aligned AMRT (Accurate  
597 Mass and Retention Time) cluster quantification algorithm developed by Qi *et al.* (78). Pathways

598 and gene functions were analyzed with information from *Pseudomonas* genome database (76),  
599 KEGG database (79) and *P. aeruginosa* metabolome database (PAMDB) (80).

600

601 **Twitching motility assays.** Twitching motility was quantified as previously described with some  
602 modifications (81). Briefly, PAO1 and  $\Delta prrF$  were streaked from freezer stocks onto tryptic soy  
603 agar plates and grown overnight at 37°C. Plates of DTSB (prepared as above) with no or  
604 100 $\mu$ M FeCl<sub>3</sub>, solidified with 1% agar were inoculated using a sterile 10 $\mu$ L pipette tip by  
605 stabbing all the way through the agar to the bottom of the plate. The plates were incubated for  
606 18 hours in a humidified 37°C chamber. To visualize the zone of twitching, the agar was  
607 removed from the plate and the petri dish was flooded with 1% crystal violet. The crystal violet  
608 was incubated for 5 minutes and washed with tap water. The diameter was measured and the  
609 average of 10 biological replicates with technical duplicates is presented along with the standard  
610 deviation.

611

612 **Real-time quantitative PCR.** Real-time quantitative PCR (qPCR) analysis of CntO was  
613 performed as previously described on five biological replicates of PAO1 grown under the  
614 conditions described above. Briefly, relative amounts of cDNA were determined by use of a  
615 standard curve generated from serial dilutions of mRNA from PAO1 grown under low iron  
616 conditions as described above, which were then reverse transcribed into cDNA. Expression was  
617 normalized to *oprF* cDNA in each sample. Primers and probe for *cntO* were as follows: Forward:  
618 TTGACAGCGCTCGTATC Reverse: AACTCCGAAGTGGTGAAG Probe:  
619 TGTACTCGAACATCGTCAGGCCGC.

620

621 **ACKNOWLEDGEMENTS**

622 We thank members of the Oglesby-Sherrouse, Wilks, and Kane laboratories for thoughtful  
623 discussion of these studies in laboratory and group meetings. We also thank Dr. Heather Neu  
624 and Dr. Sarah Michel for helpful discussion of our results regarding zinc homeostasis.

625

## 626 REFERENCES

- 627 1. Hood MI, Skaar EP. Nutritional immunity: transition metals at the pathogen-host  
628 interface. *Nat Rev Microbiol*. 2012;10(8):525-37.
- 629 2. Weinberg ED. Nutritional immunity. Host's attempt to withhold iron from microbial invaders.  
630 *Jama*. 1975;231(1):39-41.
- 631 3. Hider RC, Kong X. Chemistry and biology of siderophores. *Nat Prod Rep*.  
632 2010;27(5):637-57.
- 633 4. Huang W, Wilks A. Extracellular Heme Uptake and the Challenge of Bacterial Cell  
634 Membranes. *Annu Rev Biochem*. 2017;86:799-823.
- 635 5. Winterbourn CC. Toxicity of iron and hydrogen peroxide: the Fenton reaction. *Toxicol*  
636 *Lett*. 1995;82-83:969-74.
- 637 6. Hantke K. Iron and metal regulation in bacteria. *Curr Opin Microbiol*. 2001;4(2):172-7.
- 638 7. Massé E, Vanderpool CK, Gottesman S. Effect of RyhB Small RNA on Global Iron Use  
639 in *Escherichia coli*. *Journal of Bacteriology*. 2005;187(20):6962-71.
- 640 8. National Nosocomial Infections Surveillance (NNIS) System Report, data summary from  
641 January 1992 through June 2004, issued October 2004. *Am J Infect Control*. 2004;32(8):470-85.
- 642 9. Parsa H, Samani S. Microbiological Features and Risk Factors in Patients With Diabetic  
643 Foot Ulcers. *Wounds*. 2015;27(11):308-12.
- 644 10. Salsgiver EL, Fink AK, Knapp EA, LiPuma JJ, Olivier KN, Marshall BC, et al. Changing  
645 Epidemiology of the Respiratory Bacteriology of Patients With Cystic Fibrosis. *Chest*.  
646 2016;149(2):390-400.

- 647 11. Gjodsbol K, Christensen JJ, Karlsmark T, Jorgensen B, Klein BM, Krogfelt KA. Multiple  
648 bacterial species reside in chronic wounds: a longitudinal study. *Int Wound J*. 2006;3(3):225-31.
- 649 12. Bjorn MJ, Iglewski BH, Ives SK, Sadoff JC, Vasil ML. Effect of iron on yields of exotoxin  
650 A in cultures of *Pseudomonas aeruginosa* PA-103. *Infect Immun*. 1978;19(3):785-91.
- 651 13. Bjorn MJ, Sokol PA, Iglewski BH. Influence of iron on yields of extracellular products in  
652 *Pseudomonas aeruginosa* cultures. *J Bacteriol*. 1979;138(1):193-200.
- 653 14. Wilderman PJ, Vasil AI, Johnson Z, Wilson MJ, Cunliffe HE, Lamont IL, et al.  
654 Characterization of an endoprotease (PrpL) encoded by a PvdS-regulated gene in  
655 *Pseudomonas aeruginosa*. *Infect Immun*. 2001;69(9):5385-94.
- 656 15. Cornelis P, Dingemans J. *Pseudomonas aeruginosa* adapts its iron uptake strategies in  
657 function of the type of infections. *Frontiers in cellular and infection microbiology*. 2013;3:75.
- 658 16. Sriyosachati S, Cox CD. Siderophore-mediated iron acquisition from transferrin by  
659 *Pseudomonas aeruginosa*. *Infection and Immunity*. 1986;52(3):885.
- 660 17. Seyedmohammad S, Born D, Venter H. Expression, purification and functional  
661 reconstitution of FeoB, the ferrous iron transporter from *Pseudomonas aeruginosa*. *Protein Expr*  
662 *Purif*. 2014;101:138-45.
- 663 18. Ochsner UA, Johnson Z, Vasil ML. Genetics and regulation of two distinct haem-uptake  
664 systems, *phu* and *has*, in *Pseudomonas aeruginosa*. *Microbiology*. 2000;146 ( Pt 1):185-98.
- 665 19. Aguirre JD, Culotta VC. Battles with iron: manganese in oxidative stress protection. *J*  
666 *Biol Chem*. 2012;287(17):13541-8.
- 667 20. Damron FH, Oglesby-Sherrouse AG, Wilks A, Barbier M. Dual-seq transcriptomics  
668 reveals the battle for iron during *Pseudomonas aeruginosa* acute murine pneumonia. *Sci Rep*.  
669 2016;6:39172.
- 670 21. Wretling B, Bjorklind A, Pavlovskis OR. Role of exotoxin A and elastase in the  
671 pathogenicity of *Pseudomonas aeruginosa* strain PAO experimental mouse burn infection.  
672 *Microb Pathog*. 1987;2(6):397-404.

- 673 22. Minandri F, Imperi F, Frangipani E, Bonchi C, Visaggio D, Facchini M, et al. Role of iron  
674 uptake systems in *Pseudomonas aeruginosa* virulence and airway infection. Infection and  
675 immunity. 2016;84(8):2324-35.
- 676 23. Reinhart AA, Nguyen AT, Brewer LK, Bevere J, Jones JW, Kane MA, et al. The  
677 *Pseudomonas aeruginosa* PrrF small RNAs regulate iron homeostasis during acute murine lung  
678 infection. Infection and immunity. 2017;85(5).
- 679 24. Oglesby AG, Farrow JM, 3rd, Lee JH, Tomaras AP, Greenberg EP, Pesci EC, et al. The  
680 influence of iron on *Pseudomonas aeruginosa* physiology: a regulatory link between iron and  
681 quorum sensing. J Biol Chem. 2008;283(23):15558-67.
- 682 25. Wilderman PJ, Sowa NA, FitzGerald DJ, FitzGerald PC, Gottesman S, Ochsner UA, et  
683 al. Identification of tandem duplicate regulatory small RNAs in *Pseudomonas aeruginosa*  
684 involved in iron homeostasis. Proc Natl Acad Sci U S A. 2004;101(26):9792-7.
- 685 26. Ochsner UA, Wilderman PJ, Vasil AI, Vasil ML. GeneChip expression analysis of the  
686 iron starvation response in *Pseudomonas aeruginosa*: identification of novel pyoverdine  
687 biosynthesis genes. Molecular microbiology. 2002;45(5):1277-87.
- 688 27. Barth AL, Pitt TL. The high amino-acid content of sputum from cystic fibrosis patients  
689 promotes growth of auxotrophic *Pseudomonas aeruginosa*. J Med Microbiol. 1996;45(2):110-9.
- 690 28. Quinn RA, Lim YW, Maughan H, Conrad D, Rohwer F, Whiteson KL. Biogeochemical  
691 forces shape the composition and physiology of polymicrobial communities in the cystic fibrosis  
692 lung. MBio. 2014;5(2):e00956-13.
- 693 29. Thomas SR, Ray A, Hodson ME, Pitt TL. Increased sputum amino acid concentrations  
694 and auxotrophy of *Pseudomonas aeruginosa* in severe cystic fibrosis lung disease. Thorax.  
695 2000;55(9):795-7.
- 696 30. Distler U, Kuharev J, Navarro P, Levin Y, Schild H, Tenzer S. Drift time-specific collision  
697 energies enable deep-coverage data-independent acquisition proteomics. Nat Methods.  
698 2014;11(2):167-70.

- 699 31. Ochsner UA, Vasil ML. Gene repression by the ferric uptake regulator in *Pseudomonas*  
700 *aeruginosa*: cycle selection of iron-regulated genes. Proceedings of the National Academy of  
701 Sciences of the United States of America. 1996;93(9):4409-14.
- 702 32. Balasubramanian D, Kumari H, Jaric M, Fernandez M, Turner KH, Dove SL, et al. Deep  
703 sequencing analyses expands the *Pseudomonas aeruginosa* AmpR regulon to include small  
704 RNA-mediated regulation of iron acquisition, heat shock and oxidative stress response. Nucleic  
705 Acids Res. 2014;42(2):979-98.
- 706 33. Smith AD, Wilks A. Differential contributions of the outer membrane receptors PhuR and  
707 HasR to heme acquisition in *Pseudomonas aeruginosa*. J Biol Chem. 2015;290(12):7756-66.
- 708 34. Parmely M, Gale A, Clabaugh M, Horvat R, Zhou WW. Proteolytic inactivation of  
709 cytokines by *Pseudomonas aeruginosa*. Infect Immun. 1990;58(9):3009-14.
- 710 35. Ha S, Shin B, Park W. Lack of glyoxylate shunt dysregulates iron homeostasis in  
711 *Pseudomonas aeruginosa*. Microbiology. 2018;164(4):587-99.
- 712 36. Hassett DJ, Howell ML, Ochsner UA, Vasil ML, Johnson Z, Dean GE. An operon  
713 containing *fumC* and *sodA* encoding fumarase C and manganese superoxide dismutase is  
714 controlled by the ferric uptake regulator in *Pseudomonas aeruginosa*: *fur* mutants produce  
715 elevated alginate levels. Journal of bacteriology. 1997;179(5):1452-9.
- 716 37. Djapgne L, Panja S, Brewer LK, Gans JH, Kane MA, Woodson SA, et al. The  
717 *Pseudomonas aeruginosa* PrrF1 and PrrF2 Small Regulatory RNAs Promote 2-Alkyl-4-  
718 Quinolone Production through Redundant Regulation of the antR mRNA. J Bacteriol.  
719 2018;200(10).
- 720 38. Fujiwara T, Fukumori Y, Yamanaka T. A novel terminal oxidase, cytochrome *baa3*  
721 purified from aerobically grown *Pseudomonas aeruginosa*: it shows a clear difference between  
722 resting state and pulsed state. J Biochem. 1992;112(2):290-8.
- 723 39. Blaza JN, Bridges HR, Aragao D, Dunn EA, Heikal A, Cook GM, et al. The mechanism  
724 of catalysis by type-II NADH:quinone oxidoreductases. Sci Rep. 2017;7:40165.

- 725 40. Bandyopadhyay S, Chandramouli K, Johnson MK. Iron-Sulphur Cluster Biosynthesis.  
726 Biochem Soc Trans. 2008;36(Pt 6):1112-9.
- 727 41. Outten FW, Djaman O, Storz G. A suf operon requirement for Fe-S cluster assembly  
728 during iron starvation in Escherichia coli. Mol Microbiol. 2004;52(3):861-72.
- 729 42. Das T, Kutty SK, Tavallaie R, Ibugo AI, Panchompoo J, Sehar S, et al. Phenazine  
730 virulence factor binding to extracellular DNA is important for *Pseudomonas aeruginosa* biofilm  
731 formation. Scientific Reports. 2015;5:1-9.
- 732 43. Price-Whelan A, Dietrich LE, Newman DK. Pyocyanin alters redox homeostasis and  
733 carbon flux through central metabolic pathways in *Pseudomonas aeruginosa* PA14. Journal of  
734 bacteriology. 2007;189(17):6372-81.
- 735 44. Ramos I, Dietrich LE, Price-Whelan A, Newman DK. Phenazines affect biofilm formation  
736 by *Pseudomonas aeruginosa* in similar ways at various scales. Res Microbiol. 2010;161(3):187-  
737 91.
- 738 45. Wang Y, Kern S, Newman D. Endogenous phenazine antibiotics promote anaerobic  
739 survival of *Pseudomonas aeruginosa* via extracellular electron transfer. Journal of Bacteriology.  
740 2010;192(1):365-9.
- 741 46. Mavrodi DV, Bonsall RF, Delaney SM, Soule MJ, Phillips G, Thomashow LS. Functional  
742 analysis of genes for biosynthesis of pyocyanin and phenazine-1-carboxamide from  
743 *Pseudomonas aeruginosa* PAO1. J Bacteriol. 2001;183(21):6454-65.
- 744 47. Sakhtah H, Koyama L, Zhang Y, Morales DK, Fields BL, Price-Whelan A, et al. The  
745 *Pseudomonas aeruginosa* efflux pump MexGHI-OpmD transports a natural phenazine that  
746 controls gene expression and biofilm development. Proc Natl Acad Sci U S A.  
747 2016;113(25):E3538-47.
- 748 48. Recinos DA, Sekedat MD, Hernandez A, Cohen TS, Sakhtah H, Prince AS, et al.  
749 Redundant phenazine operons in *Pseudomonas aeruginosa* exhibit environment-dependent

- 750 expression and differential roles in pathogenicity. Proc Natl Acad Sci U S A.  
751 2012;109(47):19420-5.
- 752 49. O'Toole GA, Kolter R. Flagellar and twitching motility are necessary for *Pseudomonas*  
753 *aeruginosa* biofilm development. Mol Microbiol. 1998;30(2):295-304.
- 754 50. Patriquin GM, Banin E, Gilmour C, Tuchman R, Greenberg EP, Poole K. Influence of  
755 quorum sensing and iron on twitching motility and biofilm formation in *Pseudomonas aeruginosa*.  
756 Journal of bacteriology. 2008;190(2):662-71.
- 757 51. McFarlane JS, Lamb AL. Biosynthesis of an Opine Metallophore by *Pseudomonas*  
758 *aeruginosa*. Biochemistry. 2017;56(45):5967-71.
- 759 52. Lhospice S, Gomez NO, Ouerdane L, Brutesco C, Ghssein G, Hajjar C, et al.  
760 *Pseudomonas aeruginosa* zinc uptake in chelating environment is primarily mediated by the  
761 metallophore pseudopaline. Sci Rep. 2017;7(1):17132.
- 762 53. Ghssein G, Brutesco C, Ouerdane L, Fojcik C, Izaute A, Wang S, et al. Biosynthesis of a  
763 broad-spectrum nicotianamine-like metallophore in *Staphylococcus aureus*. Science.  
764 2016;352(6289):1105-9.
- 765 54. Pederick VG, Eijkelkamp BA, Begg SL, Ween MP, McAllister LJ, Paton JC, et al. ZnuA  
766 and zinc homeostasis in *Pseudomonas aeruginosa*. Sci Rep. 2015;5:13139.
- 767 55. Tomioka S, Nikaido T, Miyakawa T, Matsushashi M. Mutation of the N-acetylmuramyl-L-  
768 alanine amidase gene of *Escherichia coli* K-12. J Bacteriol. 1983;156(1):463-5.
- 769 56. Heidrich C, Templin MF, Ursinus A, Merdanovic M, Berger J, Schwarz H, et al.  
770 Involvement of N-acetylmuramyl-L-alanine amidases in cell separation and antibiotic-induced  
771 autolysis of *Escherichia coli*. Mol Microbiol. 2001;41(1):167-78.
- 772 57. Lenz JD, Stohl EA, Robertson RM, Hackett KT, Fisher K, Xiong K, et al. Amidase  
773 Activity of AmiC Controls Cell Separation and Stem Peptide Release and Is Enhanced by NlpD  
774 in *Neisseria gonorrhoeae*. J Biol Chem. 2016;291(20):10916-33.



- 775 58. Nguyen AT, O'Neill MJ, Watts AM, Robson CL, Lamont IL, Wilks A, et al. Adaptation of  
776 iron homeostasis pathways by a *Pseudomonas aeruginosa* pyoverdine mutant in the cystic  
777 fibrosis lung. *Journal of bacteriology*. 2014;196(12):2265-76.
- 778 59. Wright PR, Georg J, Mann M, Sorescu DA, Richter AS, Lott S, et al. CopraRNA and  
779 IntaRNA: predicting small RNA targets, networks and interaction domains. *Nucleic Acids Res*.  
780 2014;42(Web Server issue):W119-23.
- 781 60. Haas CE, Rodionov DA, Kropat J, Malasarn D, Merchant SS, de Crécy-Lagard V. A  
782 subset of the diverse COG0523 family of putative metal chaperones is linked to zinc  
783 homeostasis in all kingdoms of life. *BMC Genomics*. 2009;10:470.
- 784 61. Nguyen Y, Sugiman-Marangos S, Harvey H, Bell SD, Charlton CL, Junop MS, et al.  
785 *Pseudomonas aeruginosa* minor pilins prime type IVa pilus assembly and promote surface  
786 display of the PilY1 adhesin. *J Biol Chem*. 2015;290(1):601-11.
- 787 62. Nguyen AT, Jones JW, Ruge MA, Kane MA, Oglesby-Sherrouse AG. Iron depletion  
788 enhances production of antimicrobials by *Pseudomonas aeruginosa*. *Journal of bacteriology*.  
789 2015;197(14):2265-75.
- 790 63. Arai H, Kawakami T, Osamura T, Hirai T, Sakai Y, Ishii M. Enzymatic characterization  
791 and in vivo function of five terminal oxidases in *Pseudomonas aeruginosa*. *J Bacteriol*.  
792 2014;196(24):4206-15.
- 793 64. Kawakami T, Kuroki M, Ishii M, Igarashi Y, Arai H. Differential expression of multiple  
794 terminal oxidases for aerobic respiration in *Pseudomonas aeruginosa*. *Environ Microbiol*.  
795 2010;12(6):1399-412.
- 796 65. Sriramulu DD, Nimtz M, Romling U. Proteome analysis reveals adaptation of  
797 *Pseudomonas aeruginosa* to the cystic fibrosis lung environment. *Proteomics*. 2005;5(14):3712-  
798 21.

- 799 66. Esther CR, Jr., Coakley RD, Henderson AG, Zhou YH, Wright FA, Boucher RC.  
800 Metabolomic Evaluation of Neutrophilic Airway Inflammation in Cystic Fibrosis. *Chest*.  
801 2015;148(2):507-15.
- 802 67. Esther CR, Jr., Turkovic L, Rosenow T, Muhlebach MS, Boucher RC, Ranganathan S, et  
803 al. Metabolomic biomarkers predictive of early structural lung disease in cystic fibrosis. *Eur*  
804 *Respir J*. 2016;48(6):1612-21.
- 805 68. Romsang A, Duang-Nkern J, Leesukon P, Saninjuk K, Vattanaviboon P, Mongkolsuk S.  
806 The iron-sulphur cluster biosynthesis regulator IscR contributes to iron homeostasis and  
807 resistance to oxidants in *Pseudomonas aeruginosa*. *PLoS One*. 2014;9(1):e86763.
- 808 69. Zygiel EM, Nelson CE, Brewer LK, Oglesby-Sherrouse AG, Nolan EM. The innate  
809 immune protein human calprotectin induces iron starvation responses in *Pseudomonas*  
810 *aeruginosa*. *PNAS*. 2018;Under Review.
- 811 70. Blaby-Haas CE, Furman R, Rodionov DA, Artsimovitch I, de Crecy-Lagard V. Role of a  
812 Zn-independent DksA in Zn homeostasis and stringent response. *Mol Microbiol*.  
813 2011;79(3):700-15.
- 814 71. Helmann JD. Specificity of metal sensing: iron and manganese homeostasis in *Bacillus*  
815 *subtilis*. *J Biol Chem*. 2014;289(41):28112-20.
- 816 72. Holloway BW. Genetic recombination in *Pseudomonas aeruginosa*. *J Gen Microbiol*.  
817 1955;13(3):572-81.
- 818 73. Erde J, Loo RR, Loo JA. Enhanced FASP (eFASP) to increase proteome coverage and  
819 sample recovery for quantitative proteomic experiments. *J Proteome Res*. 2014;13(4):1885-95.
- 820 74. Wisniewski JR, Zougman A, Nagaraj N, Mann M. Universal sample preparation method  
821 for proteome analysis. *Nat Methods*. 2009;6(5):359-62.
- 822 75. Geromanos SJ, Vissers JP, Silva JC, Dorschel CA, Li GZ, Gorenstein MV, et al. The  
823 detection, correlation, and comparison of peptide precursor and product ions from data  
824 independent LC-MS with data dependant LC-MS/MS. *Proteomics*. 2009;9(6):1683-95.

- 825 76. Winsor GL, Griffiths EJ, Lo R, Dhillon BK, Shay JA, Brinkman FS. Enhanced annotations  
826 and features for comparing thousands of *Pseudomonas* genomes in the *Pseudomonas* genome  
827 database. *Nucleic acids research*. 2016;44(D1):D646-53.
- 828 77. Li GZ, Vissers JP, Silva JC, Golick D, Gorenstein MV, Geromanos SJ. Database  
829 searching and accounting of multiplexed precursor and product ion spectra from the data  
830 independent analysis of simple and complex peptide mixtures. *Proteomics*. 2009;9(6):1696-719.
- 831 78. Qi D, Brownridge P, Xia D, Mackay K, Gonzalez-Galarza FF, Kenyani J, et al. A  
832 software toolkit and interface for performing stable isotope labeling and top3 quantification using  
833 Progenesis LC-MS. *OMICS*. 2012;16(9):489-95.
- 834 79. Kanehisa M, Sato Y, Kawashima M, Furumichi M, Tanabe M. KEGG as a reference  
835 resource for gene and protein annotation. *Nucleic Acids Res*. 2016;44(D1):D457-62.
- 836 80. Huang W, Brewer LK, Jones JW, Nguyen AT, Marcu A, Wishart DS, et al. PAMDB: a  
837 comprehensive *Pseudomonas aeruginosa* metabolome database. *Nucleic Acids Res*.  
838 2018;46(D1):D575-d80.
- 839 81. Deziel E, Comeau Y, Villemur R. *Initiation of biofilm* formation by *Pseudomonas*  
840 *aeruginosa* 57RP correlates with emergence of hyperpiliated and highly adherent phenotypic  
841 variants deficient in swimming, swarming, and twitching motilities. *Journal of bacteriology*.  
842 2001;183(4):1195-204.
- 843 82. Furman R, Biswas T, Danhart EM, Foster MP, Tsodikov OV, Artsimovitch I. DksA2, a  
844 zinc-independent structural analog of the transcription factor DksA. *FEBS Lett*.  
845 2013;587(6):614-9.
- 846
- 847

848 **FIGURES AND FIGURE LEGENDS**

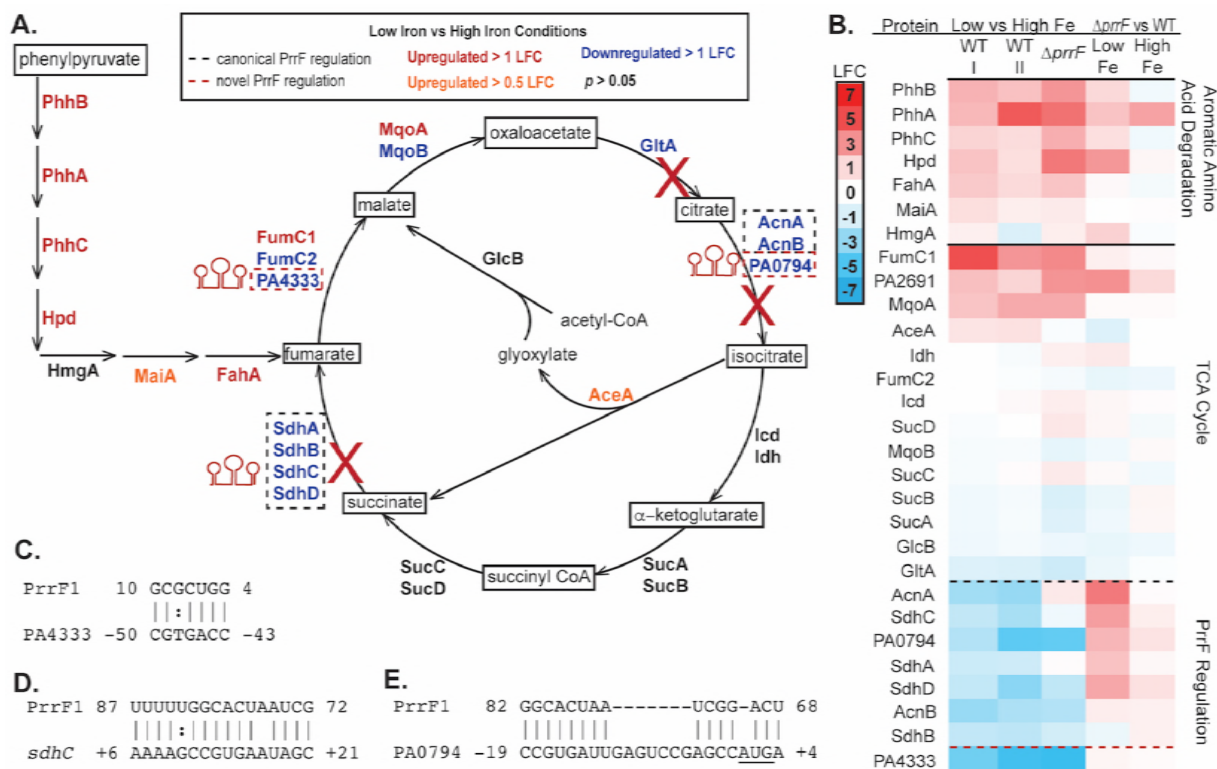

849  
 850 **Figure 1. Proteins for aromatic amino acid degradation are increased in response to low iron**  
 851 **conditions. A)** Under iron-replete conditions, *P. aeruginosa* uses the TCA cycle to generate energy.  
 852 Under low iron conditions, iron-containing proteins indicated by blue text are repressed, causing breaks in  
 853 the TCA cycle, shown with red X's. Proteomics revealed enzymes for aromatic amino acid catabolism are  
 854 upregulated under low iron conditions, indicated by red or orange text, providing the capacity to produce  
 855 the TCA cycle intermediate fumarate. A subsequent proteomics experiment was performed comparing  
 856 expression under high and low conditions of PAO1 and  $\Delta prrF$ , confirming previously identified PrrF  
 857 regulation of these proteins. Detailed annotation of the metabolic intermediates is shown in the  
 858 Supplementary Materials Figure S1. **B)** Heatmap showing changes in protein expression of aromatic  
 859 amino acid degradation enzymes and TCA cycle enzymes from the first proteomics experiment analyzing  
 860 wild type PAO1 (I) and subsequent experiment including wild type PAO1 and  $\Delta prrF$  (II). Previously  
 861 identified PrrF regulation is indicated with a black dashed line, and novel PrrF regulation is indicated  
 862 with a red dashed line. **C-E)** Novel PrrF complementarity with the PA4333 (**C**), *sdhC* (**D**), and PA0794 (**E**)  
 863 mRNAs was identified using CoprRNA (59).

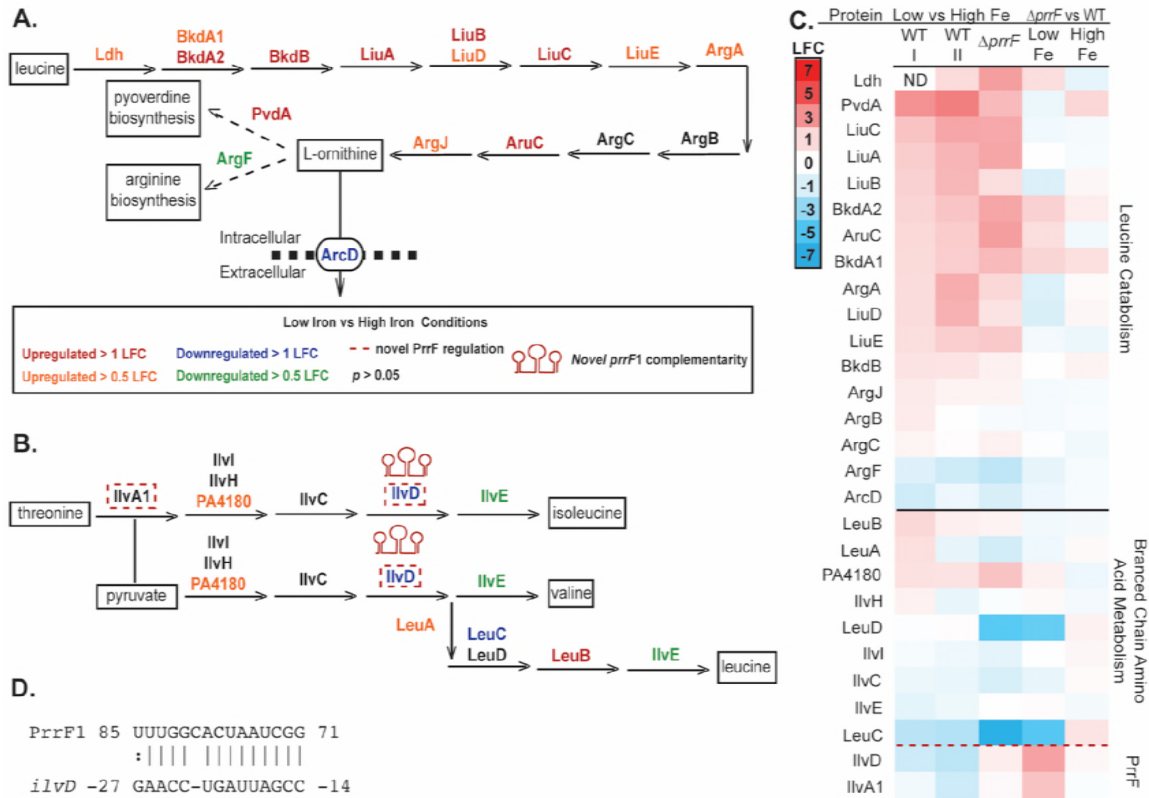

864

865 **Figure 2. Proteins for branched chain amino acid metabolism and catabolism are regulated by iron.**

866 **A)** Proteomics revealed enzymes involved in leucine catabolism to L-ornithine are upregulated in low iron

867 conditions, indicated by red and orange text. Ornithine may be spared for production of pyoverdine

868 through the downregulation of the ornithine/arginine antiporter ArcD and ArgF, the first enzyme in arginine

869 biosynthesis, indicated by blue and green text. **B)** The biosynthesis of the branched chain amino acids,

870 leucine, threonine, and valine is seemingly reduced through the downregulation of multiple biosynthesis

871 proteins in response to low iron. Detailed annotation of the metabolic intermediates for panels **A-B** is

872 shown in the Supplementary Materials Figure S2. **C)** Heatmap showing changes in protein expression of

873 branched chain amino acid biosynthesis and leucine degradation from the first proteomics experiment

874 including only wild type PAO1 (I) and subsequent experiment including wild type PAO1 and  $\Delta prrF$  (II).

875 Novel PrrF regulation of IlvD and IlvA1 was identified, as indicated by a red dashed line. **D)** PrrF

876 complementarity with the *ilvD* mRNA was identified using CopraRNA (59).

877

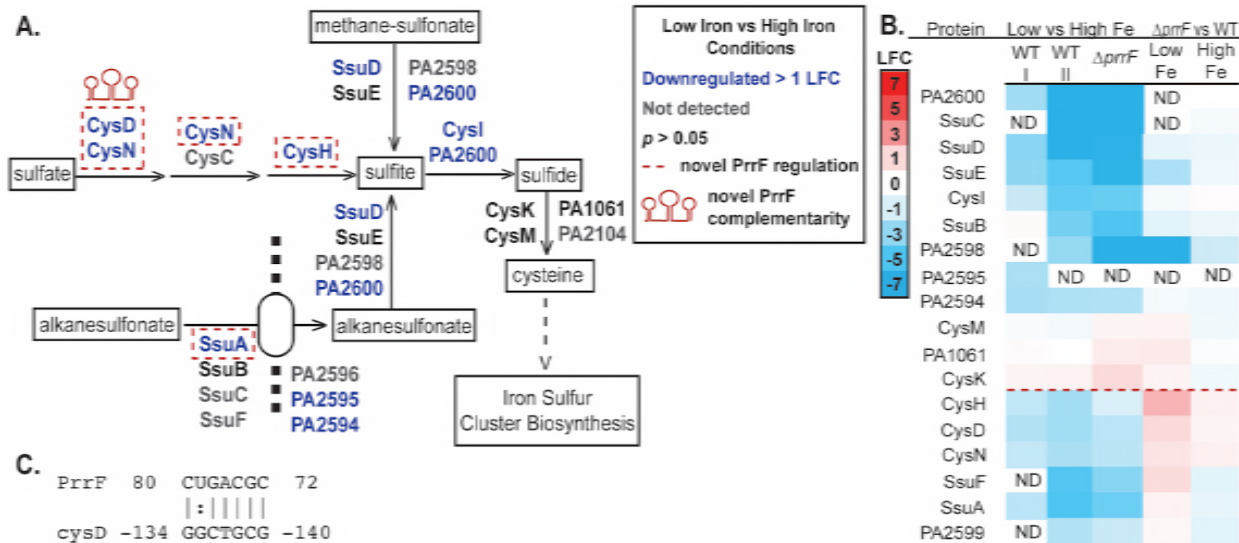

878

879 **Figure 3. Proteomics reveals iron regulation of proteins for sulfur assimilation and cysteine**

880 **biosynthesis. A)** Schematic of cysteine biosynthesis. Sulfide for cysteine biosynthesis can be generated

881 from imported extracellular alkanesulfonate, intracellular sulfate, or intracellular methane-sulfonate. Key

882 proteins involved in this process were identified as down-regulated during iron limitation (blue text),

883 indicating a decrease in cysteine production. **B)** Heatmap showing changes in protein expression of

884 cysteine biosynthesis enzymes from the first proteomics experiment with wild type PAO1 (I) and

885 subsequent experiment with wild type PAO1 and  $\Delta prrF$  (II). Novel PrrF regulation was identified for six of

886 the enzymes and separated with a red dashed line. **C)** Complementarity between the PrrF sRNA and the

887 UTR of the *cysD* mRNA was identified by CopraRNA (59).



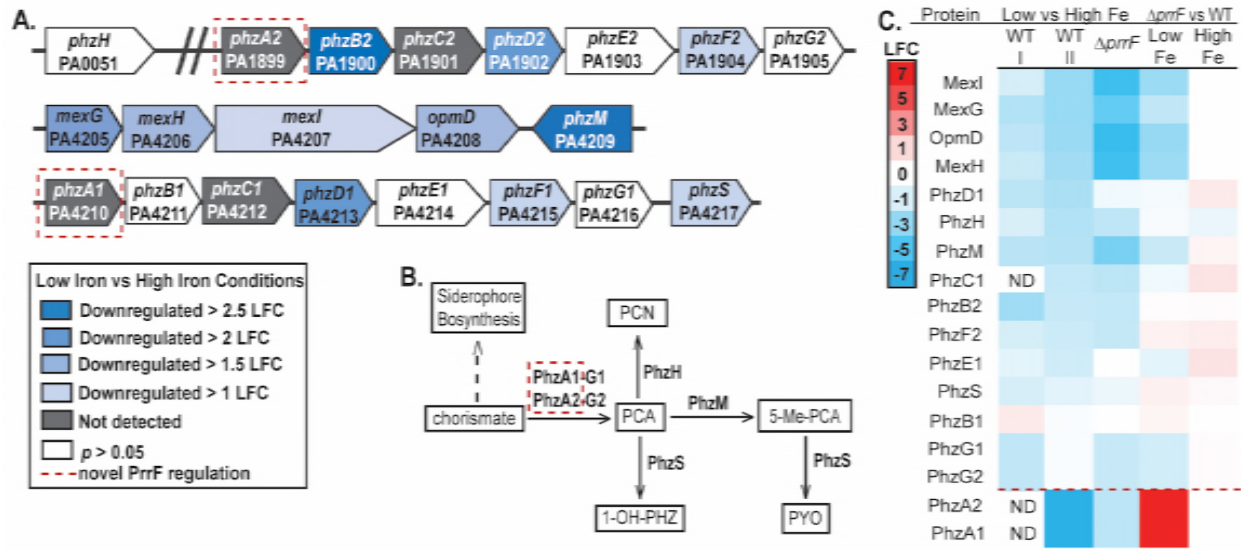

903

904 **Figure 5. Proteins for phenazine biosynthesis are downregulated under low iron conditions. A)**

905 Organization of the phenazine biosynthetic enzymes and efflux pump genetic organization. Protein

906 expression fold change under low iron conditions compared to high iron conditions is represented by color.

907 **B)** Phenazine biosynthesis pathway. Phenazine carboxylic acid (PCA) is generated from chorismate by

908 the enzymes encoded in the almost identical *phzA1-G1* and *phzA2-G2* operons. PCA can be further

909 modified by PhzH, PhzM and PhzS to form phenazine-1-carboxamide (PCN), 5-methylphenazine-1-

910 carboxylic acid (5-Me-PCA), and 1-hydroxyphenazine (1-OH-PHZ) respectively. 5-Me-PCA can be further

911 modified to form pyocyanin (PYO). PrrF-dependent iron regulation of the PhzA proteins was identified in

912 the current study and is indicated by a red dashed box. **C)** Heatmap showing log-fold changes (LFC) in

913 phenazine biosynthesis and transport protein expression from the first proteomics experiment with wild

914 type PAO1 (I) and subsequent experiment including wild type PAO1 and  $\Delta prrF$  (II). Novel PrrF regulation

915 was identified for PhzA1 and PhzA2 and denoted with a red dashed line.

916



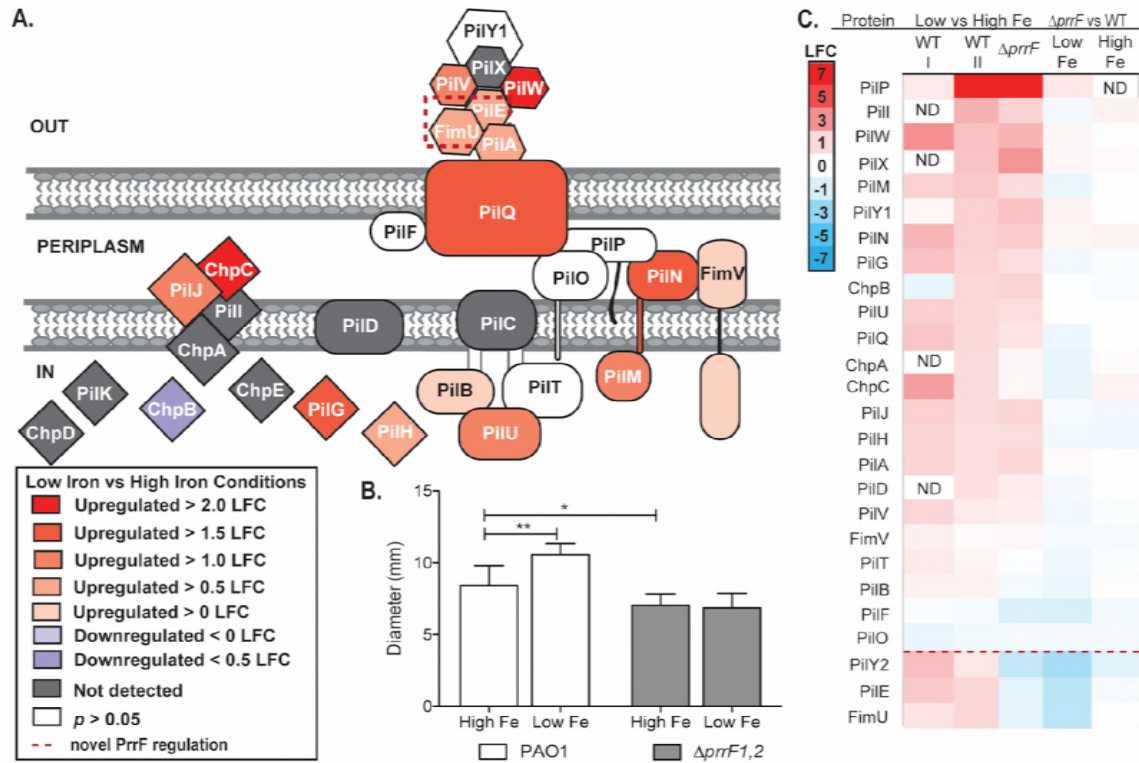

917

918 **Figure 6. Mechanism for iron regulation of twitching motility is revealed by proteomics. A)**

919 Proteomics identified iron-regulated expression of the major pilin protein PilA, and the minor pilin

920 proteins PilV, PilW, PilW, and FimU. Iron regulation was also identified for most of the assembly

921 subcomplex, which is comprised of PilF, PilQ, PilB, PilC, PilD, PilT, and PilU, and the alignment

922 subcomplex, comprised of FimV, PilP, PilO, PilN, and PilM. The pilus specific chemotaxis system (Pil-

923 Chp), comprised of PilHIJK and ChpABCDE, regulates twitching motility chemotaxis. Upregulation under

924 low iron conditions was identified for PilJ, PilG, PilH, and ChpC, indicated by orange shading of the

925 proteins, while the expression of ChpB was downregulated, indicated by blue shading of the protein. **B)**

926 Twitching motility assays were performed for PAO1 and  $\Delta prf$  and quantified after staining with 1%

927 crystal violet. Error bars represent the standard deviation of 10 biological replicates in technical duplicate.

928 Significance was determined using a Students two tailed T-test \*:  $p = 0.01$  \*\*:  $p < 0.005$ . **C)** Heatmap

929 showing log-fold changes (LFC) in the levels of twitching motility proteins from the first proteomics

930 experiment with wild type PAO1 (I) and subsequent experiment including wild type PAO1 and  $\Delta prf$  (II).

931

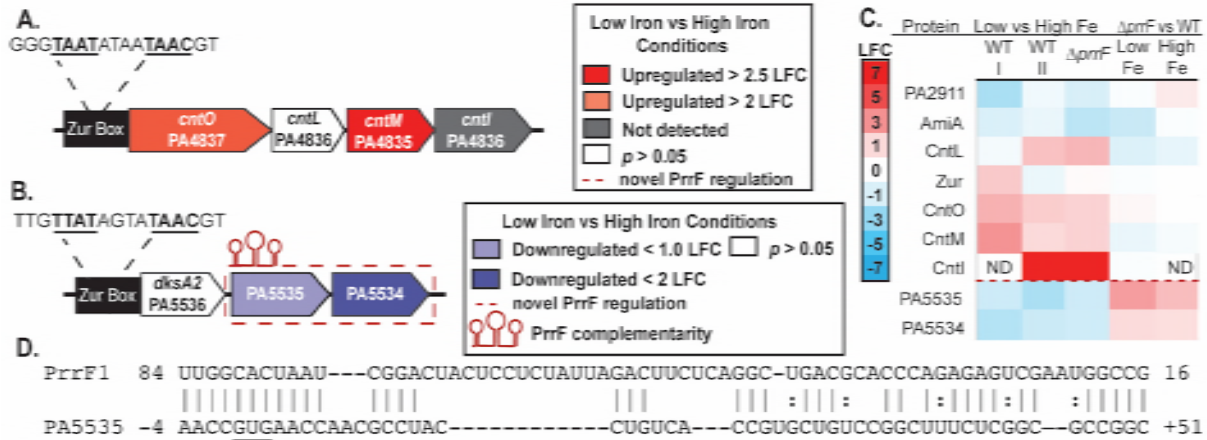

932

933 **Figure 7. Iron regulates the levels of several zinc-responsive proteins. A)** Genetic organization of the

934 *cnt* operon. Previous studies identified Zur-dependent zinc regulation of the *cnt* operon, which is

935 hypothesized to occur via a putative Zur box in the *cnt* promoter (54). Both CntO and CntM were found to

936 be upregulated by iron starvation, indicated by orange shading. **B)** DksA1-PA5535-PA5534 genetic

937 organization. The *dksA2* operon is regulated by zinc through the activity of Zur, and a Zur box was

938 identified in the *dksA2* promoter (54, 82). While DksA2 was unaffected by iron, iron activation was shown

939 for the PA5535 and PA5534 proteins (indicated by blue shading). This regulation is dependent upon the

940 *prrF* locus, indicated by a red dashed box. **C)** Heatmap showing iron-dependent log-fold changes (LFC) in

941 zinc-responsive proteins in the first proteomics experiment of wild type PAO1 (I) and the subsequent

942 experiment of wild type PAO1 and  $\Delta prrF$  (II). Novel PrrF regulation was identified for PA5535 and PA5534,

943 separated with a red dashed line. **D)** Complementarity between PrrF and the PA5535 mRNA was

944 identified using CopraRNA (59).

945

946 **LEGENDS FOR SUPPLEMENTARY MATERIALS**

947

948 **Table S1. Relative protein expression of previously identified iron regulated genes.**

949

950 **Figure S1. Detailed view of TCA cycle and aromatic amino acid metabolism showing**  
951 **metabolic intermediates.**

952

953 **Figure S2. Detailed leucine degradation (A) and branched chain amino acid degradation**  
954 **pathways (B) showing metabolic intermediates.**

955

956 **Figure S3. Representative pictures of twitching motility assay.** The assay was performed  
957 using DTSB agar plates supplemented with or without 100 $\mu$ M FeCl<sub>3</sub> supplementation solidified  
958 with 1% agar. PAO1 twitching motility with iron (A) and without iron (B). The  $\Delta$ *prrF* mutant  
959 twitching motility with iron (C) and without iron (D). The scale bar is equal to 10mm.

960

961 **Figure S4. CntO expression is upregulated under low iron conditions.** PAO1 was grown for  
962 18 hours in DTSB supplemented with and without 100 $\mu$ M FeCl<sub>3</sub>, qPCR was performed, and  
963 relative expression was determined as described in the Materials and Methods. Expression was  
964 normalized to *oprF*. The experiment was performed with  $n=5$ ,  $p=4.94 \times 10^{-7}$ .

965

966 **Supplementary Dataset S1. Excel file showing log fold change (LFC) and p values of wild type**  
967 **strain PAO1 grown in low versus high iron conditions.**
